# Supplementary material for: TRIM44 Is a Poor Prognostic Factor for Breast Cancer Patients as a Modulator of NF-κB Signaling
Source: Int J Mol Sci. 2017 Sep 8;18(9):1931. doi: 10.3390/ijms18091931 (PMC5618580; doi:10.3390/ijms18091931)
Supplement: Supplementary file 1 [file ijms-18-01931-s001.pdf]

**Table S1.** Top 20 genes up-regulated by TRIM44 knockdown in MDA-MB-231 cells.

|    | <b>Gene Symbol</b> | <b>Description</b>                                                                  | <b>Fold change</b> |
|----|--------------------|-------------------------------------------------------------------------------------|--------------------|
| 1  | C6orf99            | chromosome 6 open reading frame 99 (C6orf99), mRNA                                  | 2.178              |
| 2  | CDK19              | cyclin-dependent kinase 19 (CDK19), mRNA                                            | 2.114              |
| 3  | ZNF204P            | zinc finger protein 204, pseudogene (ZNF204P), transcript variant 1, non-coding RNA | 1.964              |
| 4  | FAM231A            | family with sequence similarity 231, member A (FAM231A), mRNA                       | 1.922              |
| 5  | ZNF594             | zinc finger protein 594 (ZNF594), mRNA                                              | 1.900              |
| 6  | C7orf69            | chromosome 7 open reading frame 69 (C7orf69), mRNA                                  | 1.878              |
| 7  | TMEM229B           | transmembrane protein 229B (TMEM229B), mRNA                                         | 1.756              |
| 8  | IGLON5             | IgLON family member 5 (IGLON5), mRNA                                                | 1.748              |
| 9  | MIR29A             | microRNA 29a (MIR29A), microRNA                                                     | 1.737              |
| 10 | RNU6-23P           | RNA, U6 small nuclear 23, pseudogene (RNU6-23P), small nuclear RNA                  | 1.720              |
| 11 | LGALS9C            | lectin, galactoside-binding, soluble, 9C (LGALS9C), mRNA                            | 1.702              |
| 12 | CEACAM8            | carcinoembryonic antigen-related cell adhesion molecule 8 (CEACAM8), mRNA           | 1.674              |
| 13 | LRRC17             | leucine rich repeat containing 17 (LRRC17), transcript variant 1, mRNA              | 1.661              |
| 14 | KU-MEL-3           | uncharacterized LOC497048 (KU-MEL-3), long non-coding RNA                           | 1.654              |
| 15 | PLSCR4             | phospholipid scramblase 4 (PLSCR4), transcript variant 1, mRNA                      | 1.642              |
| 16 | SAA2               | serum amyloid A2 (SAA2), mRNA                                                       | 1.639              |
| 17 | FABP6              | fatty acid binding protein 6, ileal (FABP6), transcript variant 1, mRNA             | 1.638              |
| 18 | CDRT1              | CMT1A duplicated region transcript 1 (CDRT1), transcript variant 2, mRNA            | 1.618              |
| 19 | DNAH6              | dynein, axonemal, heavy chain 6 (DNAH6), mRNA                                       | 1.604              |
| 20 | OR2B6              | olfactory receptor, family 2, subfamily B, member 6 (OR2B6), mRNA                   | 1.604              |

**Table S2.** Top 20 genes down-regulated by TRIM44 knockdown in MDA-MB-231 cells.

|    | Gene Symbol | Description                                                                                                     | Fold change |
|----|-------------|-----------------------------------------------------------------------------------------------------------------|-------------|
| 1  | TRIM44      | tripartite motif containing 44 (TRIM44), mRNA                                                                   | 0.3747      |
| 2  | G6PD        | glucose-6-phosphate dehydrogenase (G6PD), transcript variant 1, mRNA                                            | 0.3871      |
| 3  | CYBRD1      | cytochrome b reductase 1 (CYBRD1), transcript variant 2, mRNA                                                   | 0.4618      |
| 4  | EML4        | echinoderm microtubule associated protein like 4 (EML4), transcript variant 2, mRNA                             | 0.4638      |
| 5  | SORD        | sorbitol dehydrogenase (SORD), transcript variant 1, mRNA                                                       | 0.4708      |
| 6  | GXYLT1      | glucoside xylosyltransferase 1 (GXYLT1), transcript variant 2, mRNA                                             | 0.4765      |
| 7  | TLR4        | toll-like receptor 4 (TLR4), transcript variant 3, mRNA                                                         | 0.4828      |
| 8  | CT55        | cancer/testis antigen 55 (CT55), transcript variant 1, mRNA                                                     | 0.5366      |
| 9  | MCM9        | minichromosome maintenance complex component 9 (MCM9), transcript variant 1, mRNA                               | 0.5435      |
| 10 | PRTFDC1     | phosphoribosyl transferase domain containing 1 (PRTFDC1), transcript variant 2, mRNA                            | 0.5482      |
| 11 | GPR63       | G protein-coupled receptor 63 (GPR63), transcript variant 1, mRNA                                               | 0.5555      |
| 12 | MTOR        | mechanistic target of rapamycin (serine/threonine kinase) (MTOR), mRNA                                          | 0.5575      |
| 13 | PCDHB8      | protocadherin beta 8 (PCDHB8), mRNA                                                                             | 0.5670      |
| 14 | UBLCP1      | ubiquitin-like domain containing CTD phosphatase 1 (UBLCP1), mRNA                                               | 0.6594      |
| 15 | MMP1        | matrix metalloproteinase 1 (interstitial collagenase) (MMP1), transcript variant 2, mRNA                        | 0.5729      |
| 16 | SLC29A4     | solute carrier family 29 (equilibrative nucleoside transporter), member 4 (SLC29A4), transcript variant 1, mRNA | 0.5795      |
| 17 | PRSS2       | protease, serine, 2 (trypsin 2) (PRSS2), mRNA                                                                   | 0.5840      |
| 18 | FAM183A     | family with sequence similarity 183, member A (FAM183A), mRNA                                                   | 0.5888      |
| 19 | PLEKHS1     | pleckstrin homology domain containing, family S member 1 (PLEKHS1), transcript variant 2, mRNA                  | 0.5906      |
| 20 | ZADH2       | zinc binding alcohol dehydrogenase domain containing 2 (ZADH2), mRNA                                            | 0.6051      |

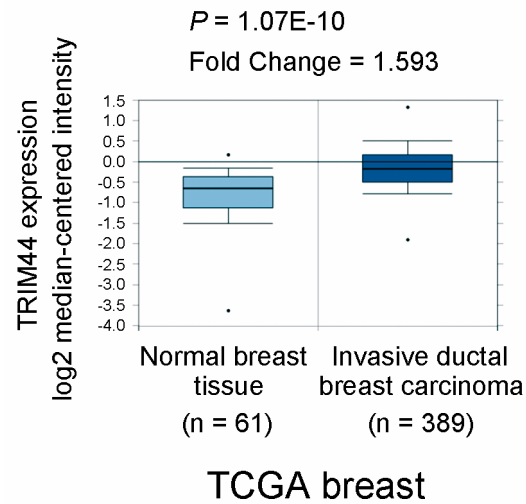

**Figure S1.** Box-whisker plots showing differential mRNA expression of TRIM44 in cancerous and non-cancerous breast tissues. The horizontal bars designate median values, and the boxes indicate the upper and the lower quartiles. The whiskers show the 90% range of values and the plots represent the maximum and the minimum values. TRIM44 mRNA expression in invasive ductal breast cancer is higher compared with normal breast tissues (Oncomine data sets: TCGA Breast).

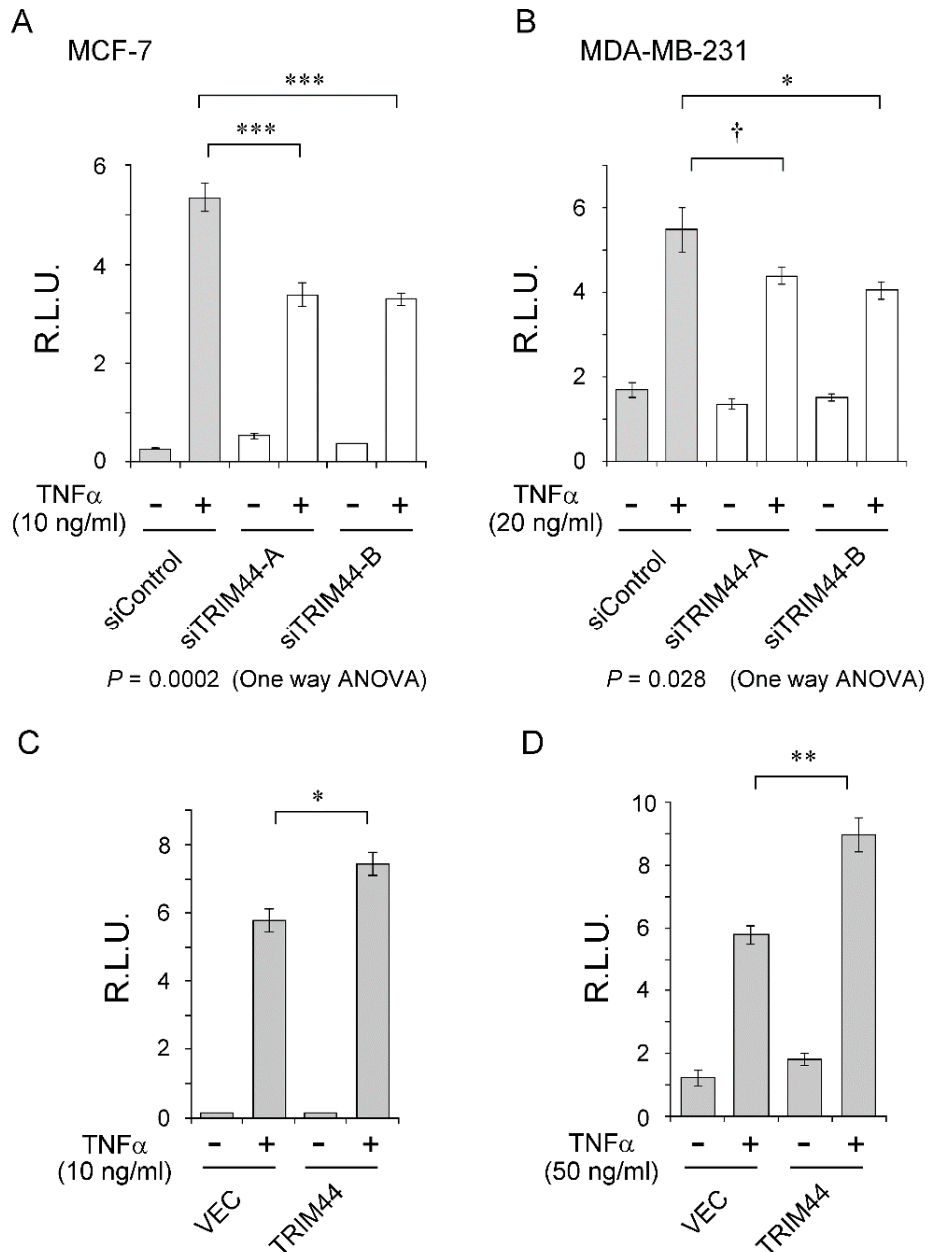

**Figure S2.** TRIM44 knockdown impaired NF- $\kappa$ B transcriptional activity in breast cancer cells. (**A** and **B**) MCF-7 cells or MDA-MB-231 cells were transfected with NF- $\kappa$ B reporter plasmid. On the next day, the cells were detached from the dish and indicated siRNAs (2 nM) were transfected by reverse transcription method. siControl-B was used as a negative control. Forty-eight hours after siRNA transfection, cells were treated with indicated concentrations of TNF $\alpha$  or vehicle (phosphate buffered saline) for another 5 h before measuring luciferase activities. Luciferase activities were shown as relative luciferase units (R.L.U.). Results are expressed as mean  $\pm$  SEM (n = 6). R.L.U. values of TNF $\alpha$  stimulated group analyzed by one-way ANOVA were significantly different in both MCF-7 and MDA-MB-231 cells. Post-hoc Dunnett's test was performed in comparison with siControl group.  $\dagger P < 0.1$ ,  $* P < 0.05$ ,  $*** P < 0.001$ . (**C** and **D**) TRIM44 expression vector (TRIM44) or empty vector (VEC) were transfected to MCF-7 cells or MDA-MB-231 cells together with NF- $\kappa$ B reporter plasmid. Twenty four hours after transfection, cells were treated with indicated concentrations of TNF $\alpha$  or vehicle (phosphate buffered saline) for another 5 hours before measuring luciferase activities. Results are expressed as mean  $\pm$  SEM (n = 3),  $* P < 0.05$ ,  $** P < 0.01$  (t-test).
